# Supplementary material for: Spatiotemporal Properties of the Action Potential Propagation in the Mouse Visual Cortical Slice Analyzed by Calcium Imaging
Source: PubMed Central journal article supplement (PMC2966408; doi:10.1371/journal.pone.0013738), 2010-10-29

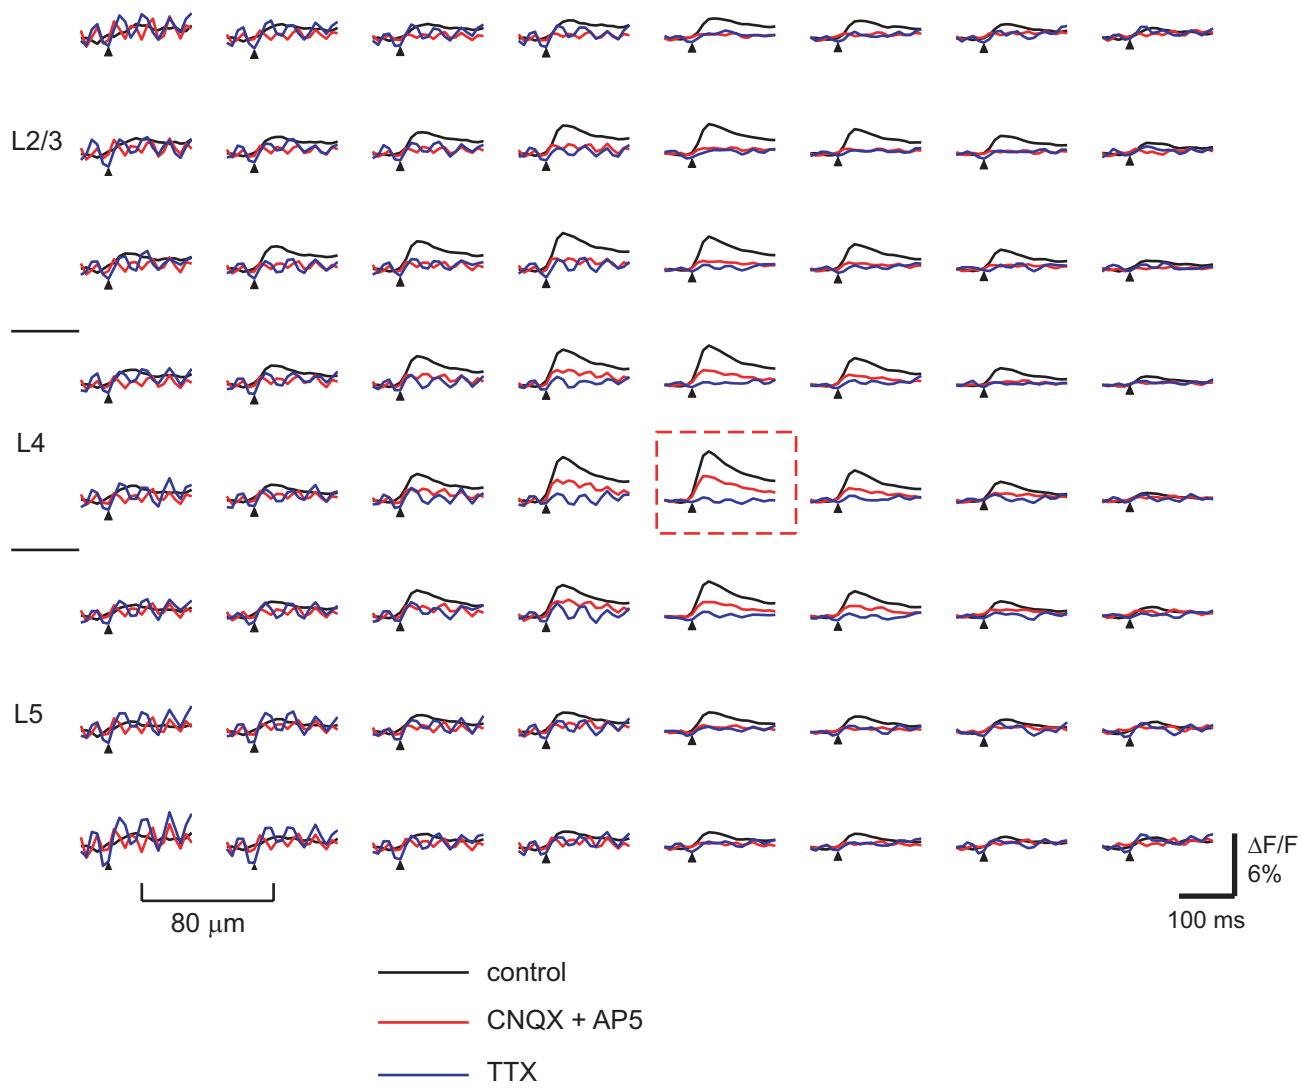

Supplement: pone.0013738.s003.pdf [file pone.0013738.s003.pdf]
